# Supplementary material for: Optimization of stimulation parameters for epi-retinal implant based on biosafety consideration
Source: PLoS One. 2020 Jul 22;15(7):e0236176. doi: 10.1371/journal.pone.0236176 (PMC7375526; doi:10.1371/journal.pone.0236176)
Supplement: S11 Table — (XLSX) [file pone.0236176.s015.xlsx]

## Sheet: Sheet1
wt short vs wt long
r{wt short}	r{wt long}	N{wt short}	N{wt long}	Zr{wt short}-Zr{wt long}	s{difference}	Z	p-value
0.2216	0.7544	112	105	-0.757751	0.137762	-5.50045	3.78814e-08
rd10 short vs rd10 long
r{rd short}	r{rd10 long}	N{rd10 short}	N{rd10 long}	Zr{rd10 short}-Zr{rd10 long}	s{difference}	Z	p-value
0.1141	0.5746	104	130	-0.539764	0.133323	-4.04855	5.15364e-05
Formula for comparing correlations measured on independent groups of subjects taken from
	Cohen, J., Cohen, P., West, S. G., & Aiken, L. S. (2003). Applied Multiple Regression/Correlation Analysis for the Behavioral Sciences. Mahwah, NJ: Erlbaum.
